# Supplementary material for: Sensitivity and consistency of long- and short-read metagenomics and epicPCR for the detection of antibiotic resistance genes and their bacterial hosts in wastewater
Source: bioRxiv or medRxiv preprint supplement (doi:10.1101/2023.08.08.23293828), 2023-08-13
Supplement: Supplementary file [file media-1.pdf]

1 Supporting Information for

2 **Sensitivity and consistency of long- and short-read metagenomics and epicPCR**  
3 **for the detection of antibiotic resistance genes and their bacterial hosts in**  
4 **wastewater**

5 Esther G. Lou<sup>1</sup>, Yilei Fu<sup>2</sup>, Qi Wang<sup>2</sup>, Todd J. Treangen<sup>2</sup> and Lauren B. Stadler<sup>1,\*</sup>

6  
7 <sup>1</sup>Department of Civil and Environmental Engineering, Rice University, 6100 Main Street,  
8 Houston, TX 77005, USA

9 <sup>2</sup>Department of Computer Science, Rice University, 6100 Main Street, Houston, TX 77005, USA

10  
11 \*Corresponding author: lauren.stadler@rice.edu

12  
13 Supplementary Tables

14 Table 1. EpicPCR primers used for fusion PCR and nested PCR

15 Table 2. Long-read and short-read sequencing read statistics

16 Table 3. Accession numbers and brief descriptions of the three publicly available wastewater  
17 datasets used for comparing long- and short-read metagenomic sequencing

18 Table 4. Microbial community composition of the WWTP influent sample generated by long-  
19 and short-read sequencing

20 Table 5. ARG hosts detected by long-read sequencing, short-read sequencing, and epicPCR

21 Table 6. Hosts of *sull*, *ermB* and *tetO* detected by long-read sequencing and epicPCR

22 Table 7. Associations between ARGs and MGEs detected by long-read sequencing

23  
24 Supplementary Figure

25 Fig. 1. Overview of the computational pipeline for analyzing long- and short-read sequencing  
26 data

27 Fig. 2. Resistome profiles revealed by long- and short-read sequencing on paired wastewater  
28 samples

29 Fig. 3. Comparison of long- and short-read sequencing in identifying ARG subtypes-host family  
30 linkages for other publicly available datasets

31 Fig. 4. Composition of chromosomal ARGs and plasmid-associated ARGs in terms of resistance  
32 mechanisms across samples

33 Fig. 5. WWTP influent and effluent hosts revealed by epicPCR and long-read sequencing  
34

## 35 **1. Methods**

### 36 **1.1 DNA extraction for long-read and short-read sequencing**

37 After biomass concentration, filters were cut into small pieces using sterilized forceps  
38 and transferred to a 2 mL tube containing 0.1 mL glass beads for bead-beating. Immediately  
39 prior to bead-beating, 1 mL CTAB buffer was added to each sample tube. Sample tubes were  
40 vortexed for 30 seconds then incubated at 95°C for 5 minutes. Then, sample tubes were removed  
41 from heat and allowed to be cooled at room temperature for no more than 2 minutes. Next,  
42 sample tubes were bead beaten at max speed in a Mini-Beadbeater 24 (3,500 RPM; 112011,  
43 BioSpec) for 1 minute. After bead-beating, samples were briefly centrifuged and added with 40  
44 µL proteinase K and 20 µL RNase A, then incubated at 70 °C for 10 minutes for lysis treatment.  
45 During the incubation, Maxwell RSC cartridges were setup following the manufacture’s manual.  
46 A volume of 300 µL lysate from each sample tube was transferred to the cartridge. Each  
47 cartridge was also added with 300 µL lysis buffer. Finally, all cartridges with added sample  
48 lysate and reagents were loaded on to the instrument for automated extraction using the  
49 “Maxwell® RSC instrument with the PureFood GMO Protocol”. After DNA extraction, DNA  
50 was eluted into 100 µL EB and stored in -80 °C before library preparations.

51

### 52 **1.2 EpicPCR**

53 1.5 mL WWTP influent sample (n=3) was centrifuged at 10,000 g for 1 minute at 4 °C.  
54 600 mL of final effluent sample (n=3) were centrifuged at 5,000 g for 10 minutes at 4 °C. Cell  
55 pellets were collected in a 2 mL microcentrifuge tube and washed in DNA grade ultrapure water  
56 for three times. Next, cells were agitated again using a vortex mixer at max speed (3000 RPM)  
57 for 45 seconds. Then, cells were diluted and stained with DAPI (4',6-diamidino-2-phenylindole)

58 to perform cell count estimation on a Neubauer hemocytometer using a fluorescent microscope  
59 (IX 71, Olympus). A final cell count of  $1 - 1.4 \times 10^7$  in 30  $\mu$ L of cell-water suspension was used  
60 for polyacrylamide bead formation and cell lysis treatment as previously described<sup>1</sup>.

61 Next, fusion PCR and nested PCR were performed for each target per sample (n=3 each  
62 sample type). Fusion PCR was conducted within 24 hours after bead formation and cell lysis to  
63 prevent DNA degradation. For fusion PCR, PCR mastermix containing fusion templates (45  $\mu$ L  
64 polyacrylamide bead solution), fusion PCR primers (the forward ARG primer F-*sulI*, F-*ermB* or  
65 F-*tetO*, the reverse 16S rRNA primer 1492R, and the linker primer RL-*sulI*-519F', RL-*ermB*-  
66 519F' or RL-*tetO*-519F'), Phusion HF DNA Polymerase (New England Biolabs), and emulsion  
67 stabilizers were homogenized in ABIL emulsion oil as previously described<sup>2</sup>. Fusion PCR  
68 conditions were optimized as follows: initial denaturation at 94 °C for 30 s; 35 cycles of  
69 denaturation at 94 °C for 5 s, primer annealing at 55 °C for 30 s, and extension at 72 °C for 30 s;  
70 a final extension step at 72 °C for 5 min. The primer sequences and amplicon sizes can be found  
71 in Table 1. Immediately after the fusion PCR reaction, 1 mM EDTA was added to the pooled  
72 sample, followed by diethyl ether/ethyl acetate wash<sup>2</sup>. Next, Monarch PCR & DNA Cleanup Kit  
73 (New England Biolabs) was used for DNA extraction from the washed beads. The purified DNA  
74 was eluted in 37  $\mu$ L of EB and was subject to nested PCR. Next, nested PCR was performed  
75 using the purified fusion PCR products.

76 Nested PCR mastermix consisting of Phusion HF DNA polymerase, HF buffer, F'-*sulI*,  
77 F-*ermB* or F-*tetO*, and reverse 16S rRNA primer 1391R was divided into quadruplicate aliquots  
78 and combined with the purified fusion PCR products. The nested PCR program consisted of an  
79 initial denaturation for 30 s at 98 °C, followed by 38 cycles of denaturation at 98 °C for 5 s,  
80 primer annealing at 60 °C (for *sulI*) or 58 °C (for *ermB*) or 55 °C (for *tetO*) for 30 s, extension at

81 72 °C for 45 s, and a final extension step at 72 °C for 10 min. The final PCR products were  
82 loaded onto a 1.5% TAE agarose gel to confirm the expected product via electrophoresis (125 V,  
83 50 minutes). DNA products of approximately 1 kbps in size were extracted using a Monarch gel  
84 extraction kit (New England Biolabs). The nested PCR products were purified again using  
85 AMPure XP beads and subject to library preparation.

86

### 87 **1.3 Integrated pipeline for analyzing long-read and short-read sequencing data**

88 We processed long-read and short-read sequencing reads in an integrated pipeline as  
89 shown in Fig. 1.

#### 90 **1.3.1 Detections of ARG-carrying reads and ARG-carrying contigs, and the associations** 91 **between ARGs and MGEs**

92 Long-read sequencing reads were screened for ARGs against the CARD database  
93 (V3.2.2) using BLAST (<https://blast.ncbi.nlm.nih.gov>) with a threshold of 70% identity and 70%  
94 length coverage. Short-read sequencing reads were assembled and processed using the resistance  
95 gene identifier (RGI, version 5.2.1<sup>3</sup>). Only contigs carrying the ARGs for which RGI produced  
96 “perfect” or “strict” match were selected for further analysis. To explicitly compare long-read  
97 and short-read sequencing on resistome characterization, ARG copy numbers generated by both  
98 methods were normalized against sequencing depth as previously described<sup>4,5</sup> to attain the  
99 relative ARG abundance in reads per billion bases sequenced (RPB). Classification of ARGs was  
100 conducted based on the oncology index file curated by CARD database. ARGs corresponding to  
101 at least two drug classes were classified as “multidrug” subtype. Beta-lactam resistant ARGs  
102 which confer resistance to carbapenem were selected and categorized as the “carbapenem”  
103 subtype.

104 ARG-carrying reads (long-read sequencing) and contigs (short-read sequencing) were  
105 subject to BLASTX under the minimum E-value  $1 \times 10^{-5}$  with a length and identity threshold of  
106 70% using a MGE database curated by NanoARG<sup>4</sup>. Long-read and short-read sequencing read  
107 statistics are provided in Table 2.

108 To evaluate the results of the comparison between long- and short-read sequencing in  
109 terms of ARG-host identification, we downloaded three publicly available datasets from two  
110 previous studies<sup>6,7</sup>. Both studies conducted long-read and short-read sequencing technologies to  
111 sequence the same wastewater samples. Details on the datasets are provided in Table 3.

112

### 113 **1.3.2 Sample-wise taxonomical abundance estimation for long-read and short-read** 114 **sequencing data**

115 The sample-wise taxonomical abundance estimation for long-read data was performed  
116 via Centrifuge v1.0.4. The program was run directly on ONT and Illumina reads and Centrifuge  
117 generated a report that contained the sample abundances.

118

## 119 **2. Results and discussion**

### 120 **2.1 EpicPCR sequencing statistics**

121 During read QC, we noticed that even though the size of PCR products was verified via  
122 electrophoresis, 50.94% of sequenced DNA still had a read length of shorter than 1 kbps, which  
123 may have been due to DNA fragmentation during gel purification and library preparation. We  
124 performed an alignment step during which reads were scrutinized for perfect match (i.e., 100%  
125 identity and 100% coverage) against the corresponding reverse linker primer sequence. This  
126 alignment step is the key to exclude false positives as it filtered out a substantial body of

127 relatively short reads, which were likely partially fused PCR products. As a result, after this  
128 alignment step, the vast majority (71.8%) of remaining reads had a length falling within the  
129 range of 1007-1089 bps (i.e., the expected length range of nested PCR products given the primer  
130 design). Furthermore, the ARG portion of the remaining reads aligned to the corresponding ARG  
131 references in SARG database with relatively high sequence similarity and coverage. The average  
132 identity of alignment was  $93.8 \pm 3.1\%$  for *ermB*,  $93.9 \pm 3.0\%$  for *sull*, and  $94.2 \pm 3.0\%$  for  
133 *tetO*. The average length coverage of alignment was  $96.4 \pm 9.8\%$  for *ermB*,  $99.4 \pm 6.9\%$  for  
134 *sull*, and  $77.5 \pm 5.3\%$  for *tetO*. With respect to the 16S rRNA gene portion of reads, most  
135 remaining reads ( $91.8 \pm 9.4\%$ ) passed the 16S rRNA gene alignment criteria of Emu (i.e., the  
136 16S rRNA annotation tool used in this study)<sup>8</sup> and generated species-level classifications. These  
137 results underscore the successful acquisition of ARG-16S rRNA gene fusion structures.

138

## 139 **2.2 Direct comparison of long- and short-read sequencing for resistome analysis**

### 140 **2.2.1 Long-read sequencing resulted in the detection of a more diverse and abundant** 141 **resistome as compared to short-read sequencing**

142 We first compared long- and short-read sequencing in their ability to characterize the  
143 diversity of ARGs (defined as the number of unique ARGs) and the relative abundance of ARGs  
144 (the copy number of ARGs normalized to sequencing depth) present in the samples. Overall, for  
145 raw wastewater (WWTP influent), long-read sequencing detected 347 ARGs with a total ARG  
146 relative abundance of 614 reads per billion bases (RPB), whereas short-read sequencing detected  
147 191 ARGs with a total ARG relative abundance of 341 RPB. The total ARG relative abundance  
148 generated by both methods was comparable to previous metagenomic analyses that quantified  
149 ARGs of wastewater samples collected from western countries<sup>9-11</sup>. Therefore, in our study, long-

150 read sequencing detected a significantly more diverse and abundant ARG profile as compared to  
151 short-read sequencing, which was surprising since the long-read sequencing depth was much  
152 shallower - only 10.12% of that of the short-read counterpart. One explanation for the better  
153 performance of long-read sequencing is its higher ARG detection sensitivity, underscored by the  
154 significantly higher proportion of ARG-associated reads among all long-read sequencing reads  
155 (0.0576%) as compared to the proportion of ARG-associated contigs among all short-read-  
156 assembled contigs (0.0119%).

157         The greater detection sensitivity of long-read sequencing is likely the result of a better  
158 preservation of the information of raw reads as compared to short-read sequencing. To elaborate,  
159 for short-read sequencing data, only 34.3% of raw reads mapped to the analyzed contigs,  
160 indicating a significant read loss during de novo assembly, which is a common issue for  
161 environmental metagenomes<sup>12-14</sup>. Of note, the analyzed contigs corresponded to those passed the  
162 length filter (1,500 bp), which accounted for approximately 23.1% of all assembled contigs,  
163 indicating the length of the assembled contigs was a limiting factor of ARG detection by short-  
164 read sequencing. In this study, short-read assembly was treated as a necessary step to avoid false  
165 positives caused by highly similar and relatively short ARG reference sequences. After de novo  
166 assembly, only 0.0125% of the assembled contigs passed through the filter of the ARG  
167 alignment step (based on RGI “perfect” and “strict” matches for ARG calling)<sup>3</sup>. For long-read  
168 processing, 100% of reads were directly subject to ARG alignment because no assembly was  
169 needed, and 14.8% of reads passed the filter of the ARG alignment step. Assembly of long reads  
170 was not performed due to the limited coverage (data not shown). Therefore, the number of ARG-  
171 carrying reads via long-read sequencing was greater than the number of ARG-carrying contigs  
172 via short-read sequencing (Table 2). Another reason long-read sequencing may have been more



173 sensitive is because, on average, the size of the ARG-carrying reads (mean size=5,387 bp) was  
174 significantly larger than the ARG-carrying contigs (mean size=3,488 bp;  $p=1.592e^{-05}$ ). Longer  
175 reads increased the likelihood of detecting multiple ARGs on the same reads. The number and  
176 fraction of long reads carrying more than one ARG (413; 23.7%) were greater than the number  
177 and fraction of contigs carrying more than one ARG (24; 10.7%). In addition, the contigs that  
178 carried more than one ARGs were carrying two or three ARGs, whereas 26.6% of the long reads  
179 that carried more than one ARGs were carrying at least three and up to six ARGs. Taken  
180 together, long-read sequencing resulted in higher ARG detection sensitivity than short-read  
181 sequencing by preventing read loss and through the generation of extended length of ARG-  
182 carrying reads.

183         However, both methods identified a comparable ARG composition with respect to ARG  
184 subtypes; each method detected the same suite of 20 ARG subtypes in wastewater (Fig. 2a).  
185 Approximately 90% of the total ARGs detected by each method belonged to subtypes of  
186 sulfonamide, macrolide-lincosamide-streptogramin (MLS), tetracycline, multidrug, carbapenem,  
187 aminoglycoside, antiseptics, and non-carbapenem-beta-lactams. The consistency between long-  
188 read and short-read sequencing in characterizing ARG subtypes has also been reported in other  
189 studies of wastewater samples and activated sludge samples<sup>6</sup>, mock bacterial communities<sup>15</sup>, and  
190 a plant population with a known bacteria spike<sup>4</sup>.

### **2.2.2 Long-read sequencing detected more ARGs located on chromosomes, plasmids, and on different types of mobile genetic elements (MGEs) as compared to short-read sequencing**

Next, we compared the genetic location of ARGs assigned by each sequencing method. Both methods captured ARGs distributed across different genetic locations, namely, plasmid and chromosome. In addition, the associations between ARGs and MGEs (transposases, integrases, recombinases, and integrons) were also recovered. Long-read sequencing exhibited a greater abundance of ARGs that were associated with every single genetic location as compared to short-read sequencing (Fig. 2b). More specifically, long-read sequencing showed a significantly higher abundance of plasmid-associated ARGs, 6-fold higher than that of short-read sequencing, and a strikingly higher abundance of class 1 integron-integrase genes (*IntI1*)-associated ARGs, 16-fold higher than that of short-read sequencing (Fig. 2b). The less sensitive detection of MGE-associated ARGs by short-read sequencing was likely the result of the de novo assembly process. To elaborate, the variable copy number and the highly homologous and repetitive sequence compositions of MGEs make it problematic to assemble MGE-associated reads. As shown in a previous study, 82-94% of chromosomal sequences were correctly assembled and binned, but only 38-44% of genomic islands and 1-29% of plasmid sequences were identified in a simulated low-complexity short-read metagenome<sup>16</sup>. A similar degree of read loss during short-read assembly was also observed in several other studies of wastewater metagenomes<sup>5,12,17,18</sup>. Long-read sequencing, on the other hand, does not require assembly as it generates long reads that can be directly searched against MGE databases. Therefore, long-read sequencing can overcome the data loss issue associated with assembly, making it more feasible to detect ARG-MGE linkages.

So far, only a handful of studies have compared using long-read and short-read sequencing to determine the genetic locations of ARGs in wastewater samples. One study that obtained reads via Nanopore sequencing and contigs assembled from Illumina-sequencing reads found that both resulted plasmid-associated ARGs for all major subtypes of ARGs in wastewater and activated sludge samples<sup>6</sup>. Similarly, in this study, ARGs were found to be primarily located on plasmids rather than chromosomes (Fig. 2b). In addition, ARGs were mostly co-located with transposases and *IntI1* (Fig. 2b). We also investigated the distribution of ARGs across different genetic locations with respect to ARG subtypes (Fig. 2c). For ARGs conferring resistance to carbapenem, multidrug, MLS, diaminopyrimidine, aminoglycoside, tetracycline, nucleoside, and bacitracin, long-read sequencing demonstrated a consistent or slightly wider MGE distribution range compared to short-read sequencing (Fig. 2c). However, the distribution patterns of sulfonamide resistance genes, peptide resistance genes, rifamycin resistance genes, and antiseptics resistance genes were distinct for each method. Short-read sequencing assigned these ARGs only to plasmids whereas long-read sequencing assigned these ARGs not only to plasmids but also to other MGEs (Fig. 2c). This inconsistency was likely due to the significantly lower number of ARG-associated contigs detected by short-read sequencing for those specific ARGs (data not shown), which limited its ability to fully capture the potential of those ARGs being associated with MGEs. While this is not the first study to elucidate the genomic locations of ARGs by investigating the genetic context of ARGs, it is the first to explicitly compare long-read and short-read sequencing in profiling the distribution of ARGs across genomic locations (i.e., chromosomes, plasmids, and other MGEs) in wastewater.

### **2.3 Host range detected by epicPCR**

For *sulI* hosts, epicPCR classified 61 Proteobacteria species and nine Bacteroidetes species (Table 5). NCBI Reference Sequence Database (RefSeq) reported consistent *sulI*-host phylum associations, more than 99% (25,195) of the reference sequences associated with *sulI* in bacteria were assigned to Proteobacteria. In previous studies characterizing hosts of *sulI* in wastewater, Bacteroidetes was identified as the dominant host phyla along with Proteobacteria<sup>19,20</sup>. To focus on the host range at the family level, the top three host families of *sulI* classified by epicPCR are Rhodocyclaceae, Aeromonadaceae, and Comamonadaceae, which was consistent with the *sulI* host range profiled by another targeted method using proximity ligation<sup>21</sup>. For *ermB* hosts, epicPCR identified 17 Proteobacteria species, 12 Bacteroidetes species, two Firmicute species, and one Fusobacteria species (Table 5). In RefSeq, *ermB* was predominantly associated with Proteobacteria (2,415 records), followed by Firmicutes (33 records). Recently, *ermB* has been found more frequently in Bacteroidetes species and was characterized as mobilizable based on its association with certain conjugative transposons<sup>22,23</sup>. Lastly, for *tetO* hosts, epicPCR detected 59 Firmicutes species, 6 Proteobacteria species, and 2 Bacteroidetes species. Consistently, according to NCBI RefSeq, *tetO* was found to be associated with Firmicutes (121 records), Proteobacteria (111 records), and Bacteroidetes (16 records). Almost all hosts detected by long-read sequencing were subsets of the host range detected by epicPCR as discussed in the manuscript. In addition, long-read sequencing and epicPCR demonstrated a consistent host range profile that *sulI* was mainly associated with Proteobacteria, *tetO* was mainly associated with Firmicutes, and *ermB* was mainly associated with Bacteroidetes and Firmicutes (Table 6).

## 2.4 The profiles of ARG hosts across the WWTP influent and effluent revealed by long-read sequencing and epicPCR

WWTP influent and effluent hosts were the most consistent at the phylum level as shown by epicPCR and long-read sequencing as discussed in the manuscript. In the WWTP effluent, as demonstrated by long-read sequencing, there were 12 ARG host species that were not detected in WWTP influent (hereafter referred to as “new hosts”) as well as eight ARG host species which persisted across the whole treatment process (hereafter referred to as “persistent hosts”). In addition, none of the new hosts were found in the secondary effluent samples (data not shown). The persistent hosts included *E. coli* carrying *mdt* genes (i.e., *mdtE*, *mdtN*, and *mdtO*; subtype: efflux pumps) and *Aeromonas caviae* carrying *OXA-504* (subtype: multidrug/carbapenem). The new hosts included *Pseudomonas sp. BJP69* carrying *MexD* (subtype: efflux pump), *Pseudomonas oleovorans* carrying *mexF* (subtype: efflux pump), *Salmonella enterica* carrying *OXA-256* (subtype: multidrug/carbapenem), *Pandoraea thiooxydans* carrying *ceoB* (subtype: efflux pump), *Enterobacter kobei* carrying *ramA* (subtype: efflux pump), and *Burkholderia pseudomallei* carrying *MuxB* (subtype: efflux pump). Those ARG hosts (*E. coli*, *A. caviae*, *S. enterica*, *E. kobei*, and *B. pseudomallei*) are putative pathogenic species. This finding emphasizes a critical need to include them as the risk indicators, because they were harboring resistance genes of clinical relevance while at the same time poorly responsive to wastewater treatment.

Our results also showed that all ARG-carrying plasmids found in secondary effluent (containing 33 ARG-carrying plasmid reads) and final effluent (containing 56 ARG-carrying plasmid reads), as well as most (966 out of 970) ARG-carrying plasmids in influent, were classified as nonmobilizable plasmids due to the lack of a MOB. Only four out of 970 ARG-

carrying plasmid reads in influent were found to carry MOB genes. However, although long-read sequencing generated greater length reads as compared to short-read assembled contigs, the average length of ARG-carrying, plasmid-associated reads was 4,885 bps. This suggests incomplete plasmids were assembled and thus may not have contained information needed to call mobility for a plasmid. For example, the length range of 14 representative ARG-bearing conjugative plasmids isolated from WWTPs was reported to be 35,925-290,014 kbps<sup>24</sup>, much longer than the plasmid-associated read length. Therefore, we cannot draw a solid conclusion regarding the mobility of plasmids given that the relatively short plasmid-associated reads captured incomplete plasmid sequences.

Table 1. EpicPCR primers used for fusion PCR and nested PCR.

| Fusion PCR  |                        |                                             |                                                            |                         |
|-------------|------------------------|---------------------------------------------|------------------------------------------------------------|-------------------------|
| ARG         | Primer                 | Sequence (5' - 3')                          | Reference                                                  |                         |
| <i>sulI</i> | F- <i>sulI</i>         | AAATGCTGCGAGTYGGMKCA                        | 25                                                         |                         |
|             | RL- <i>sulI</i> -519F' | GWATTACCGCGGCKGCTGAA<br>CMACCAKCCTRCAGTCCG  | 19                                                         |                         |
| <i>ermB</i> | F- <i>ermB</i>         | GAACACTAGGGTTGTTCTTGC<br>A                  | 26                                                         |                         |
|             | RL- <i>ermB</i> -519F' | GWATTACCGCGGCKGCTGCT<br>GGAACATCTGTGGTATGGC | The reverse primer portion of<br><i>ermB</i> <sup>26</sup> |                         |
| <i>tetO</i> | F- <i>tetO</i>         | ACGGARAGTTTATTGTATAACC                      | 27                                                         |                         |
|             | RL- <i>tetO</i> -519F' | GWATTACCGCGGCKGCTGTG<br>GCGTATCTATAATGTTGAC | The reverse primer portion of<br><i>tetO</i> <sup>27</sup> |                         |
|             | 16S rRNA -1492R        | GGTTACCTTGTTACGACTT                         | 1                                                          |                         |
| Nested PCR  |                        |                                             |                                                            |                         |
| ARG         | Primer                 | Sequence (5' - 3')                          | Reference                                                  | Final product size (bp) |
| <i>sulI</i> | F'- <i>sulI</i>        | GACGCCCTGTCCSRTCWGAT                        | 19                                                         | 1037                    |
| <i>ermB</i> | F- <i>ermB</i>         | GAACACTAGGGTTGTTCTTGC<br>A                  | 26                                                         | 1007                    |
| <i>tetO</i> | F- <i>tetO</i>         | ACGGARAGTTTATTGTATAACC                      | 27                                                         | 1043                    |
|             | U519F-block10          | TTTTTTTTTTCAGCMGCCGCG<br>GT AATWC/3SpC3/    | 1                                                          |                         |
|             | U519R-block10          | TTTTTTTTTTGWATTACCGCG<br>GC KGCTG/3SpC3/    |                                                            |                         |
|             | 16S rRNA -1391R        | GACGGGCGGTGTGTRCA                           | 28                                                         |                         |

Table 2. Long- and short-read sequencing read statistics.

| Method                | Sample                   | Total bases    | Number of reads/contigs | Length N50 (bp) |
|-----------------------|--------------------------|----------------|-------------------------|-----------------|
| Long-read sequencing  | Influent (n=3)           | 4,318,719,998  | 1,178,106               | 4,748           |
| Short-read sequencing |                          | 42,663,854,700 | 1,796,758               | 1,210           |
| Long-read sequencing  | Secondary effluent (n=3) | 2,885,452,624  | 464,436                 | 7,159           |
| short-read sequencing | Final effluent (n=3)     | 1,944,820,196  | 1,513,866               | 1,493           |



Table 3. Accession numbers and brief descriptions of the three publicly available wastewater datasets used for comparing long- and short-read metagenomic sequencing

| ID     | Sequencing platform | Instrument                   | Total bases | Sample               | Sampling region                                | SRR Accession | Reference |
|--------|---------------------|------------------------------|-------------|----------------------|------------------------------------------------|---------------|-----------|
| ST_IN  | Illumina            | Illumina HiSeq 4000 (PE 150) | 18G         | Municipal wastewater | Hong Kong                                      | SRR8208343    | 6         |
|        | ONT                 | ONT MinION                   | 2.4G        |                      |                                                | SRR7497167    |           |
| B_WW_1 | Illumina            | Illumina HiSeq 2500 (PE150)  | 5.9G        |                      | The greater Boston area, in Massachusetts, USA | SRR12917052   | 7         |
|        | ONT                 | ONT MinION                   | 1.3G        |                      |                                                | SRR12917048   |           |
| B_WW_2 | Illumina            | Illumina HiSeq 2500 (PE150)  | 5.6G        |                      |                                                | SRR12917051   |           |
|        | ONT                 | ONT MinION                   | 0.82G       |                      |                                                | SRR12917047   |           |

Table 4. Microbial community composition of the WWTP influent sample generated by long- and short-read sequencing

| Family             | Relative abundance via long-read sequencing | Relative abundance via short-read sequencing |
|--------------------|---------------------------------------------|----------------------------------------------|
| Enterobacteriaceae | 4.66                                        | 6.24                                         |
| Bacillaceae        | 0.58                                        | 3.1                                          |
| Pseudomonadaceae   | 3.22                                        | 3.08                                         |
| Streptomycetaceae  | 1.03                                        | 2.22                                         |
| Flavobacteriaceae  | 0.67                                        | 2.16                                         |
| Burkholderiaceae   | 1.67                                        | 1.9                                          |
| Lactobacillaceae   | 0.26                                        | 1.88                                         |
| Streptococcaceae   | 1.22                                        | 1.73                                         |
| Mycobacteriaceae   | 0.73                                        | 1.56                                         |
| Microbacteriaceae  | 0.5                                         | 1.45                                         |
| Xanthomonadaceae   | 1.05                                        | 1.35                                         |
| Rhizobiaceae       | 0.63                                        | 1.23                                         |
| Corynebacteriaceae | 0.16                                        | 1.23                                         |
| Mycoplasmataceae   | 0.11                                        | 1.22                                         |
| Sphingomonadaceae  | 0.49                                        | 1.07                                         |
| Campylobacteraceae | 0.49                                        | 1.04                                         |
| Vibrionaceae       | 0.39                                        | 1.03                                         |
| Paenibacillaceae   | 0.35                                        | 0.98                                         |

|                                               |                                             |                                              |
|-----------------------------------------------|---------------------------------------------|----------------------------------------------|
| Comamonadaceae                                | 5.06                                        | 0.97                                         |
| Pasteurellaceae                               | 0.45                                        | 0.97                                         |
| Staphylococcaceae                             | 0.16                                        | 0.95                                         |
| Moraxellaceae                                 | 1.82                                        | 0.89                                         |
| Yersiniaceae                                  | 0.32                                        | 0.89                                         |
| Clostridiaceae                                | 0.48                                        | 0.87                                         |
| Roseobacteraceae                              | 0.24                                        | 0.83                                         |
| Species                                       | Relative abundance via long-read sequencing | Relative abundance via short-read sequencing |
| Salmonella enterica                           | 0.05                                        | 2.09                                         |
| Escherichia coli                              | 0.26                                        | 1.16                                         |
| Bacillus cereus group                         | 0.1                                         | 0.57                                         |
| Helicobacter pylori                           | 0.02                                        | 0.47                                         |
| Bacillus subtilis group                       | 0.04                                        | 0.44                                         |
| pseudomallei group                            | 0.11                                        | 0.42                                         |
| Listeria monocytogenes                        | 0.01                                        | 0.38                                         |
| Pseudomonas syringae group                    | 0.08                                        | 0.35                                         |
| spotted fever group                           | 0.01                                        | 0.29                                         |
| Enterobacter cloacae complex                  | 0.42                                        | 0.28                                         |
| Pseudomonas aeruginosa group                  | 1.08                                        | 0.27                                         |
| Burkholderia cepacia complex                  | 0.26                                        | 0.26                                         |
| Buchnera aphidicola                           | 0.03                                        | 0.26                                         |
| Staphylococcus aureus                         | 0.01                                        | 0.26                                         |
| Burkholderia pseudomallei                     | 0.04                                        | 0.25                                         |
| Yersinia pseudotuberculosis complex           | 0.01                                        | 0.22                                         |
| Pseudomonas fluorescens group                 | 0.14                                        | 0.2                                          |
| Acinetobacter calcoaceticus/baumannii complex | 0.12                                        | 0.2                                          |
| Pseudomonas putida group                      | 0.17                                        | 0.19                                         |
| Klebsiella pneumoniae                         | 0.13                                        | 0.19                                         |
| Pseudomonas aeruginosa                        | 0.25                                        | 0.18                                         |
| Bacillus amyloliquefaciens group              | 0.01                                        | 0.18                                         |
| Mycobacterium avium complex (MAC)             | 0.03                                        | 0.17                                         |
| Bacillus thuringiensis                        | 0.01                                        | 0.17                                         |
| Vibrio harveyi group                          | 0.06                                        | 0.16                                         |

A

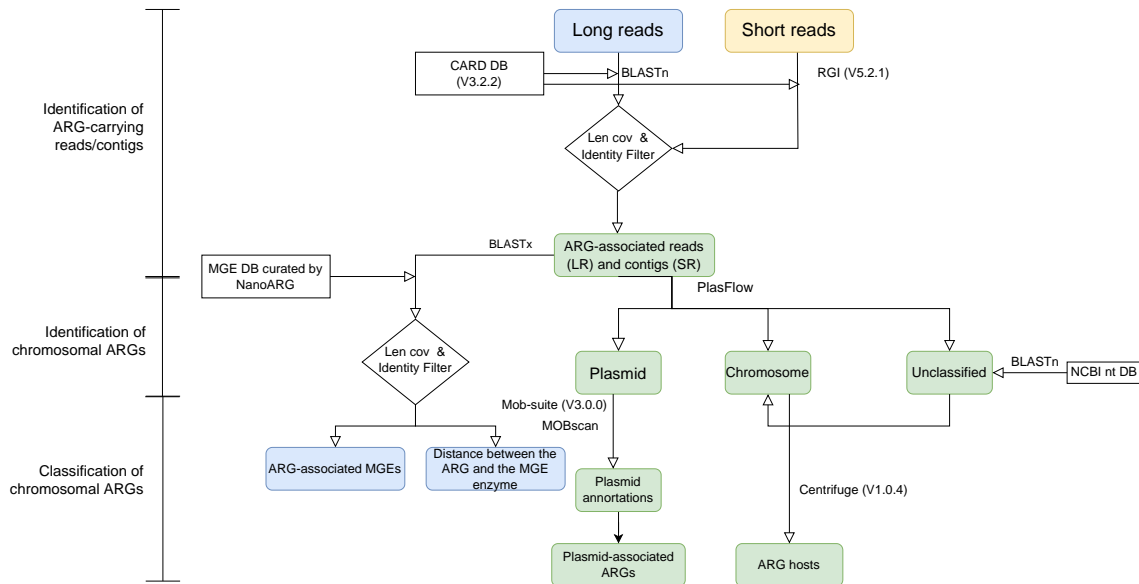

B

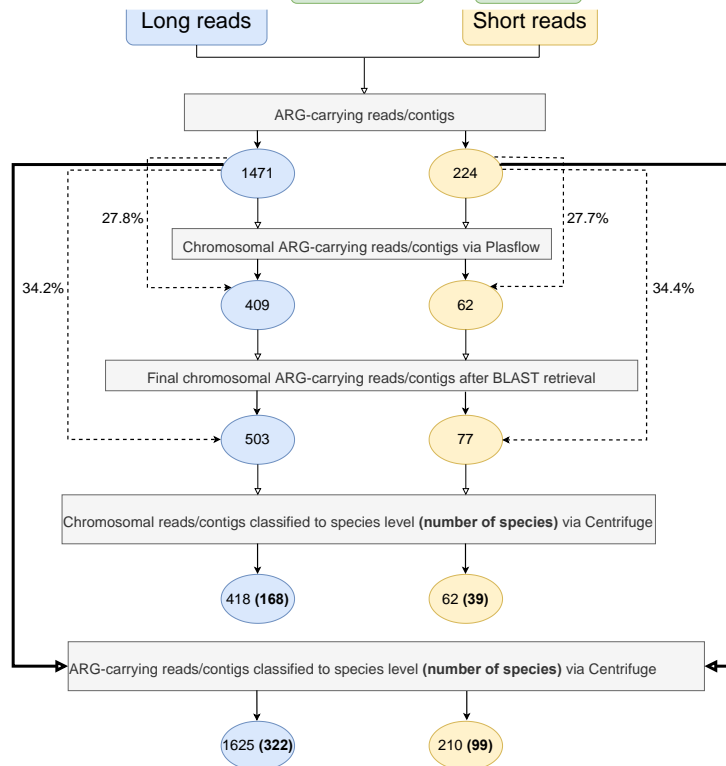

**Fig. 1.** Overview of the computational pipeline for analyzing long- and short-read sequencing data. A. The detailed pipeline. B. The output of each step, in terms of the number of reads (long-read sequencing) and contigs (short-read sequencing), and the number of host species classified based on chromosomal ARGs and all ARGs.

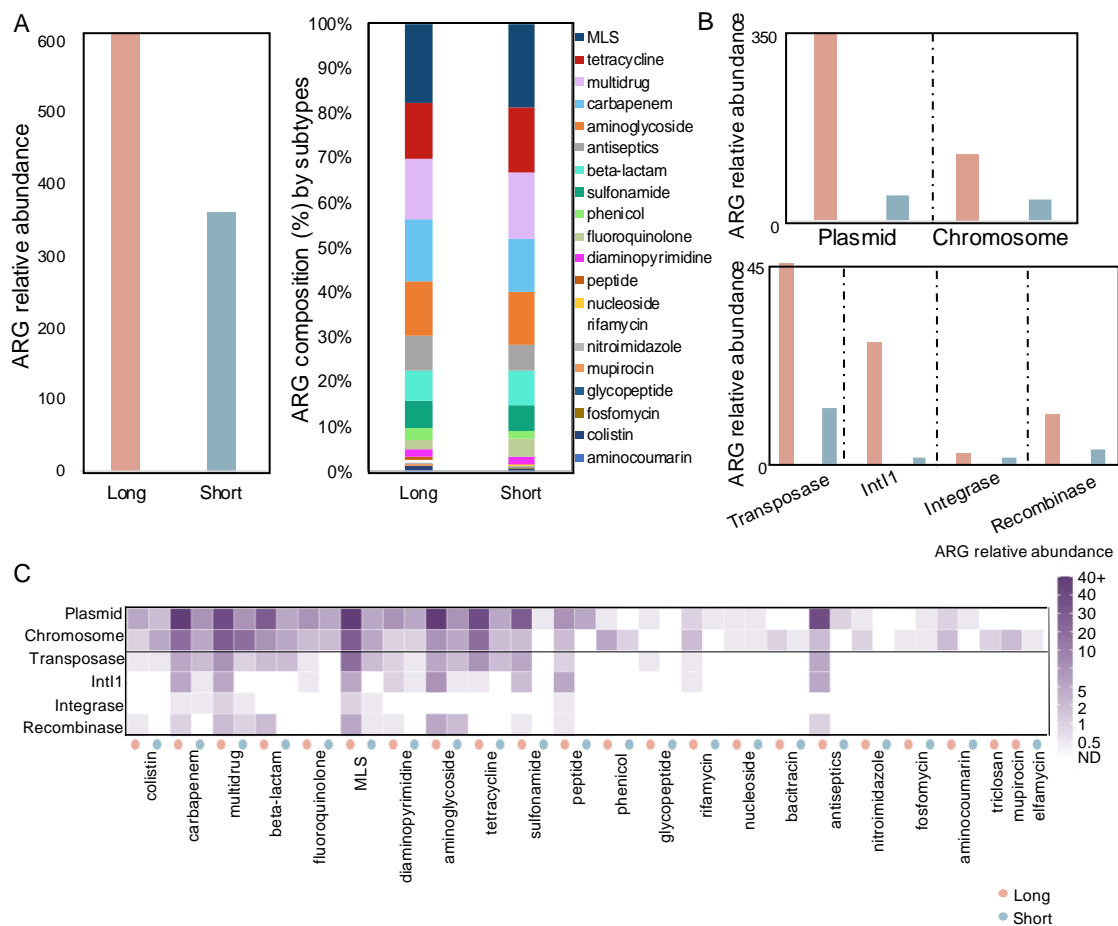

**Fig. 2.** Resistome profiles revealed by long- and short-read sequencing on paired wastewater samples ( $n = 3$ ). **A.** Total ARG relative abundance revealed by long- and short-read sequencing (left) and ARG composition broken down by drug class subtype (right) according to the relative abundance of ARGs of each subtype. **B.** Distribution of total ARGs across genetic locations (plasmid or chromosome) and the associations between ARGs and MGEs as determined by long- and short-read sequencing. ARGs associated with more than one MGE were counted separately for each MGE involved. **C.** Distribution of ARGs (grouped by drug class subtype on the x-axis) across genetic locations and ARG-MGE associations revealed by long- and short-read sequencing.

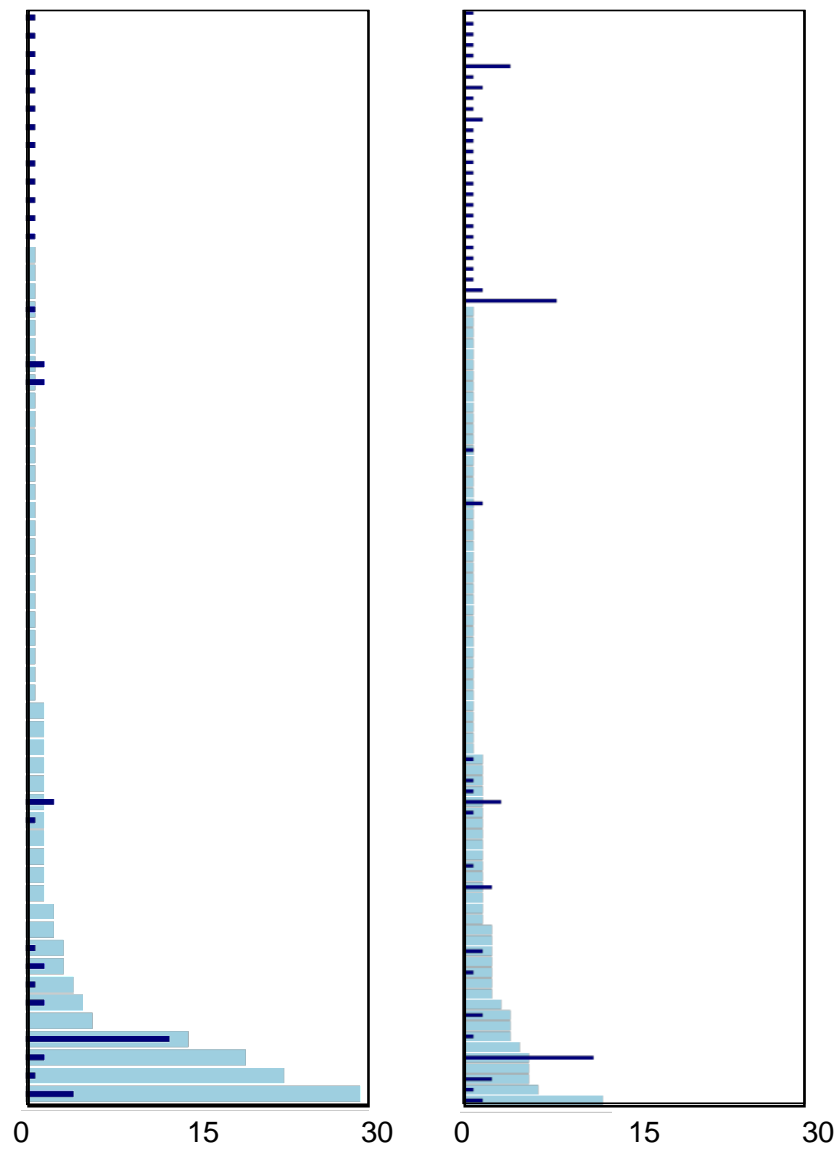

**Fig. 3.** Comparison of long- and short-read sequencing in identifying ARG subtypes-host family linkages for other publicly available datasets. Left: sample ID: B\_WW\_2<sup>7</sup>, right: ST\_IN<sup>6</sup>.

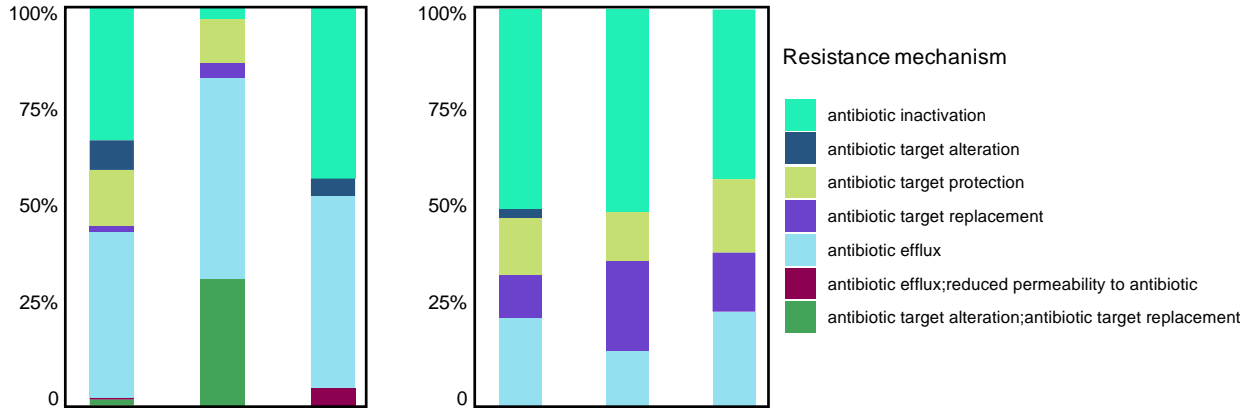

**Fig. 4.** Composition of chromosomal ARGs and plasmid-associated ARGs in terms of resistance mechanisms across samples.

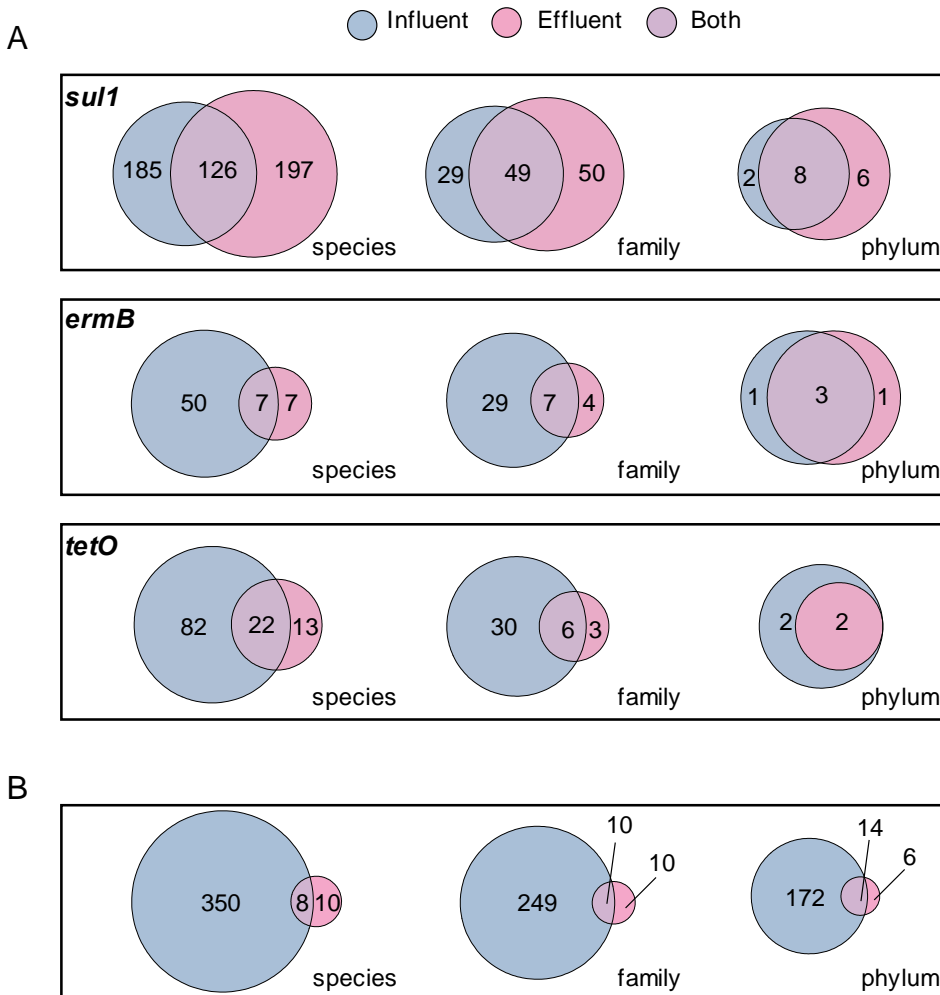

**Fig. 5.** WWTP influent and effluent hosts revealed by epicPCR and long read sequencing. a. The count of WWTP influent (blue) and effluent (violet) hosts revealed by epicPCR. The numbers of hosts for the three ARGs (*sul1*, *ermB* and *tetO*) are shown at species, family, and phylum level, respectively. b. The count of influent (blue) and effluent (violet) hosts revealed by long-read sequencing. Unique combinations of each ARG and its host counted at the species, family, and phylum level, respectively.

## References

1. Spencer, S. J. *et al.* Massively parallel sequencing of single cells by epicPCR links functional genes with phylogenetic markers. *ISME J* **10**, 427–436 (2016).
2. Spencer, S. *et al.* epicPCR (Emulsion, Paired Isolation, and Concatenation PCR). *Protocol Exchange* (2015) doi:10.1038/protex.2015.094.
3. Alcock, B. P. *et al.* CARD 2020: antibiotic resistome surveillance with the comprehensive antibiotic resistance database. *Nucleic Acids Res* **48**, D517–D525 (2020).
4. Arango-Argoty, G. A. *et al.* NanoARG: a web service for detecting and contextualizing antimicrobial resistance genes from nanopore-derived metagenomes. *Microbiome* **7**, 88 (2019).
5. Ma, L. *et al.* Metagenomic Assembly Reveals Hosts of Antibiotic Resistance Genes and the Shared Resistome in Pig, Chicken, and Human Feces. *Environ. Sci. Technol.* **50**, 420–427 (2016).
6. Che, Y. *et al.* Mobile antibiotic resistome in wastewater treatment plants revealed by Nanopore metagenomic sequencing. *Microbiome* **7**, 44 (2019).
7. Fuhrmeister, E. R. *et al.* Surveillance of potential pathogens and antibiotic resistance in wastewater and surface water from Boston, USA and Vellore, India using long-read metagenomic sequencing. 2021.04.22.21255864 <https://www.medrxiv.org/content/10.1101/2021.04.22.21255864v1> (2021) doi:10.1101/2021.04.22.21255864.
8. Curry, K. D. *et al.* Emu: species-level microbial community profiling of full-length 16S rRNA Oxford Nanopore sequencing data. *Nat Methods* **19**, 845–853 (2022).
9. Hendriksen, R. S. *et al.* Global monitoring of antimicrobial resistance based on metagenomics analyses of urban sewage. *Nat Commun* **10**, 1124 (2019).
10. Kutilova, I. *et al.* Extended-spectrum beta-lactamase-producing *Escherichia coli* and antimicrobial resistance in municipal and hospital wastewaters in Czech Republic: Culture-based and metagenomic approaches. *Environmental Research* **193**, 110487 (2021).
11. Riquelme, M. V. *et al.* Wastewater Based Epidemiology Enabled Surveillance of Antibiotic Resistance. *medRxiv* 2021.06.01.21258164 (2021) doi:10.1101/2021.06.01.21258164.
12. Deshpande, A. S. & Fahrenfeld, N. L. Abundance, diversity, and host assignment of total, intracellular, and extracellular antibiotic resistance genes in riverbed sediments. *Water Research* **217**, 118363 (2022).
13. Ma, L., Li, A. D., Yin, X. L. & Zhang, T. The Prevalence of Integrons as the Carrier of Antibiotic Resistance Genes in Natural and Man-Made Environments. *Environ. Sci. Technol.* **51**, 5721–5728 (2017).
14. Zhao, R. *et al.* Deciphering the mobility and bacterial hosts of antibiotic resistance genes under antibiotic selection pressure by metagenomic assembly and binning approaches. *Water Research* **186**, 116318 (2020).
15. Leggett, R. M. *et al.* Rapid MinION profiling of preterm microbiota and antimicrobial-resistant pathogens. *Nat Microbiol* **5**, 430–442 (2020).
16. Maguire, F. *et al.* Metagenome-assembled genome binning methods with short reads disproportionately fail for plasmids and genomic Islands. *Microbial Genomics*, **6**, e000436 (2020).
17. Liang, J. *et al.* Identification and quantification of bacterial genomes carrying antibiotic resistance genes and virulence factor genes for aquatic microbiological risk assessment. *Water Research* **168**, 115160 (2020).
18. Liu, Z. *et al.* Metagenomic and metatranscriptomic analyses reveal activity and hosts of antibiotic resistance genes in activated sludge. *Environment International* **129**, 208–220 (2019).
19. Wei, Z. *et al.* High-Throughput Single-Cell Technology Reveals the Contribution of Horizontal Gene Transfer to Typical Antibiotic Resistance Gene Dissemination in Wastewater Treatment Plants. *Environ. Sci. Technol.* (2021) doi:10.1021/acs.est.1c01250.
20. Zhang, G. *et al.* Metagenomic and network analyses decipher profiles and co-occurrence patterns of antibiotic resistome and bacterial taxa in the reclaimed wastewater distribution system. *Journal of Hazardous Materials* **400**, 123170 (2020).

21. Stalder, T., Press, M. O., Sullivan, S., Liachko, I. & Top, E. M. Linking the resistome and plasmidome to the microbiome. *The ISME Journal* **13**, 2437–2446 (2019).
22. Gupta, A., Vlamakis, H., Shoemaker, N. & Salyers, A. A. A New Bacteroides Conjugative Transposon That Carries an ermB Gene. *Appl Environ Microbiol* **69**, 6455–6463 (2003).
23. Okitsu, N. *et al.* Characterization of ermB Gene Transposition by Tn1545 and Tn917 in Macrolide-Resistant *Streptococcus pneumoniae* Isolates. *J Clin Microbiol* **43**, 168–173 (2005).
24. Che, Y. *et al.* High-resolution genomic surveillance elucidates a multilayered hierarchical transfer of resistance between WWTP- and human/animal-associated bacteria. *Microbiome* **10**, 16 (2022).
25. Wei, Z. *et al.* Exploring abundance, diversity and variation of a widespread antibiotic resistance gene in wastewater treatment plants. *Environment International* **117**, 186–195 (2018).
26. Stedtfeld, R. D. *et al.* Primer set 2.0 for highly parallel qPCR array targeting antibiotic resistance genes and mobile genetic elements. *FEMS Microbiology Ecology* **94**, fiy130 (2018).
27. Aminov, R. I., Garrigues-Jeanjean, N. & Mackie, R. I. Molecular Ecology of Tetracycline Resistance: Development and Validation of Primers for Detection of Tetracycline Resistance Genes Encoding Ribosomal Protection Proteins. *Applied and Environmental Microbiology* **67**, 22–32 (2001).
28. Lane, D. J. *et al.* Rapid determination of 16S ribosomal RNA sequences for phylogenetic analyses. *Proceedings of the National Academy of Sciences* **82**, 6955–6959 (1985).
